# Supplementary material for: Molecular Typing, Characterization of Antimicrobial Resistance, Virulence Profiling and Analysis of Whole-Genome Sequence of Clinical Klebsiella pneumoniae Isolates
Source: PubMed Central journal article supplement (PMC7277670; doi:10.3390/antibiotics9050261), 2020-05-17
Supplement: antibiotics-09-00261-s001.pdf [file antibiotics-09-00261-s001.pdf]

**Table S1.** Virulence genes revealed in the whole genomes of the isolates.

| Sample id/function | ferric yersiniabactin uptake receptor | iron regulatory protein | aerobactin transporter genes | mrk cluster (fimbriae) | yersiniabactin | other        |
|--------------------|---------------------------------------|-------------------------|------------------------------|------------------------|----------------|--------------|
| P-6                |                                       |                         |                              | mrkFHIJ                |                |              |
| P-26               |                                       |                         |                              | mrkABCDHIJ             |                |              |
| P-28               |                                       |                         |                              | mrkABCDHIJ             |                |              |
| P-29               |                                       |                         | iucCD, iutA                  | mrkABCDFHIJ            |                |              |
| P-45               |                                       |                         |                              | mrkABCDFHIJ            |                |              |
| P-68               | fyuA                                  | irp2                    |                              | mrkABCDFHIJ            | ybtAEQSUX      |              |
| P-69               |                                       |                         |                              | mrkABCDFHIJ            |                |              |
| P-75               | fyuA                                  | irp2                    |                              | mrkABCDFIJ             | ybtAQSUX       |              |
| P-99               |                                       |                         |                              | mrkABCDFHIJ            |                |              |
| P-108              | fyuA                                  | irp1                    | iucACD, iutA                 | mrkABCDFIJ             | ybtAEQSUX      | rmpA         |
| P-115              |                                       |                         |                              | mrkABCDFHIJ            |                | mceABCDEGHIJ |
| P-116              | fyuA                                  | irp2                    |                              | mrkABCDFHIJ            | ybtAEQSUX      |              |
| P-120              | fyuA                                  | irp2                    |                              | mrkABCDFHIJ            | ybtAEQSUX      |              |
| P-133              |                                       |                         |                              | mrkABCDFHIJ            |                |              |
| P-134              | fyuA                                  | irp2                    | iucACD, iutA                 | mrkABCDFHIJ            | ybtAEUX        |              |
| P-137              | fyuA                                  | irp2                    |                              | mrkABCDFHIJ            | ybtAEU         | iroBCDN      |
| P-140              | fyuA                                  | irp1                    | iucACD, iutA                 | mrkABCDFIJ             | ybtAEQSUX      | rmpA         |
| P-142              |                                       |                         |                              | mrkABCDFHIJ            |                |              |
| P-152              | fyuA                                  | irp1                    | iucACD, iutA                 | mrkABCDHIJ             | ybtAEQSUX      |              |
| P-154              | fyuA                                  | irp2                    |                              | mrkABCDFHIJ            | ybtAEQSUX      |              |
| P-160              | fyuA                                  | irp1, irp2              | iucCD, iutA                  | mrkABDFHIJ             | ybtAEQSUX      |              |
| P-176              | fyuA                                  | irp2                    |                              | mrkABCDFHIJ            | ybtAEQSUX      |              |
| P-183              |                                       |                         |                              | mrkABCDFHIJ            |                |              |
| P-185              | fyuA                                  |                         |                              |                        | ybtAEQSUX      |              |
| P-187              | fyuA                                  | irp2                    | iucACD, iutA                 | mrkABCDFHIJ            | ybtAEUX        |              |
| P-190              |                                       |                         |                              | mrkADFH                |                |              |
| P-197              |                                       |                         |                              | mrkAB                  |                |              |
| P-200              | fyuA                                  | irp1, irp2              | iucCD, iutA                  | mrkABCDFIJ             | ybtAQSUX       |              |
| P-212              | fyuA                                  |                         |                              | mrkABH                 | ybtAEQSU       | kfuC         |
| P-223              | fyuA                                  |                         | iucCD, iutA                  | mrkABCDFIJ             | ybtAQSUX       |              |
| P-226              | fyuA                                  | irp1, irp2              | iucACD, iutA                 | mrkABDFHIJ             | ybtAEQSUX      |              |
| P-234              | fyuA                                  | irp2                    |                              | mrkABCDFHIJ            | ybtAEUX        |              |
| P-237              | fyuA                                  | irp1                    |                              | mrkABCDFHIJ            | ybtAEPSUX      | kfuABC       |
| P-250              |                                       |                         |                              | mrkABCDFHIJ            |                |              |
| P-253              | fyuA                                  | irp1                    |                              | mrkABCDFHIJ            | ybtAEPSUX      | kfuABC       |
| P-259              | fyuA                                  |                         |                              | mrkABH                 | ybtAEQSU       | kfuC         |

allS and entB are not shown for the sake of brevity.
